# Supplementary material for: Organic–inorganic hybrid coating materials derived from renewable soybean oil and amino silanes
Source: Royal Society of Chemistry journal article supplement (doi:10.1039/d0ra01279c), 2020-01-01
Supplement: d0ra01279c1.pdf [file d0ra01279c1.pdf]

## Supporting Information For:

# Organic–inorganic hybrid coating materials derived from renewable soybean oil and amino silanes

Xuyang Luo, Fei Gao\*, Fengbiao Chen, Qian Cheng, Jinze Zhao, Xiao Wei, Cong  
Lin, Jiang Zhong, Liang Shen\*

Jiangxi Engineering Laboratory of Waterborne Coating, School of Chemistry and  
Chemical Engineering, Jiangxi Science & Technology Normal University, Nanchang  
330013, Jiangxi, P. R. China

E-mail address: [feigao2016@jxstnu.com.cn](mailto:feigao2016@jxstnu.com.cn) (F. Gao); [liangshen@jxstnu.com.cn](mailto:liangshen@jxstnu.com.cn) (L.  
Shen).

## Table of Contents

|                                                                                        |   |
|----------------------------------------------------------------------------------------|---|
| 1. Calculation of the yield of acetoacetylated soybean oil by <sup>1</sup> H NMR ..... | 2 |
| 1.1 Calculation of the yield of modified soybean oil (MSO) .....                       | 2 |
| 1.2 Calculation of the yield of acetoacetylated soybean oil (MA-SO) .....              | 3 |
| 2. The GPC of acetoacetylated soybean oil .....                                        | 4 |
| 3. The DSC curves indicating glass transition of the three films (P1, P2, P3) .....    | 5 |

# 1. Calculation of the yield of acetoacetylated soybean oil by $^1\text{H}$ NMR

## 1.1 Calculation of the yield of modified soybean oil (MSO)

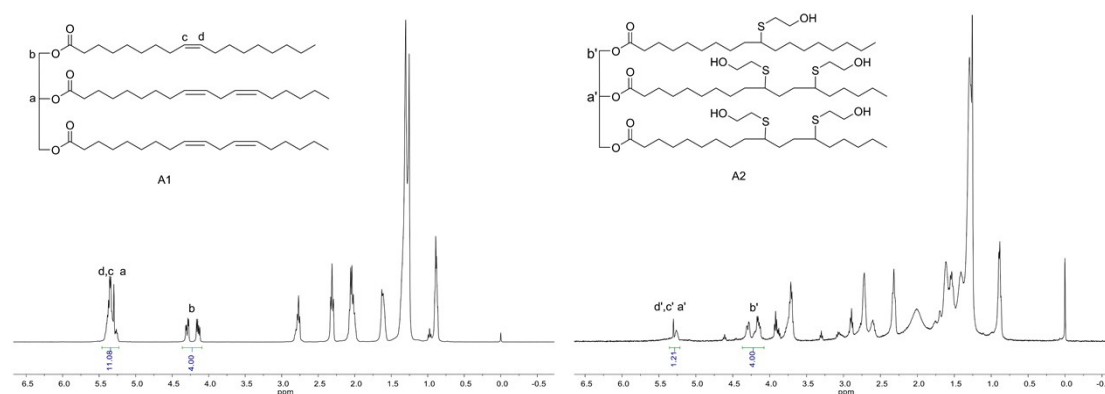

**Figure S1**  $^1\text{H}$  NMR spectra of (a) soybean oil (SO) and (b) modified soybean oil (MSO)

**Figure S1** shows that the peak area of b is 4, and the peak areas of a, c and d are 11.08; thus, the  $^1\text{H}$  NMR peak areas correspond to the compound structure. Therefore, we can calculate the yield on the basis of the peak area ratios. The yield of modified soybean oil (A2),  $W(\%) = [A(d+c)-A(d'+c')]/A(d+c) = [(11.08-1)-(1.21-1)]/(11.08-1) = 0.98$

## 1.2 Calculation of the yield of acetoacetylated soybean oil (MA-SO)

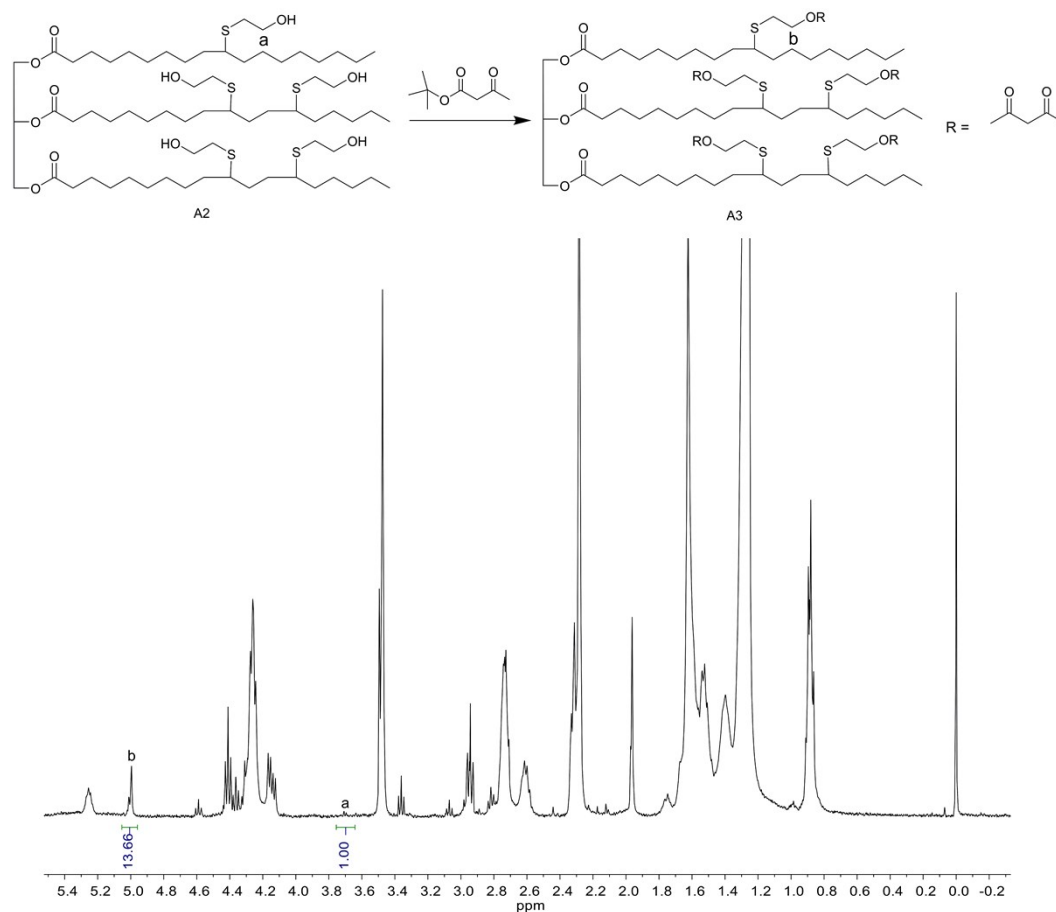

**Figure S2** <sup>1</sup>H NMR spectra of (a) the modified soybean oil (MSO) and (b) the acetoacetylated soybean oil (MA-SO)

The calculation method is the same as in 1.1, and the yield of modified soybean oil (A3),  $W(\%) = A(b)/[A(b)+A(a)] = (13.66)/(13.66+1) = 0.93$

## 2. The GPC of acetoacetylated soybean oil

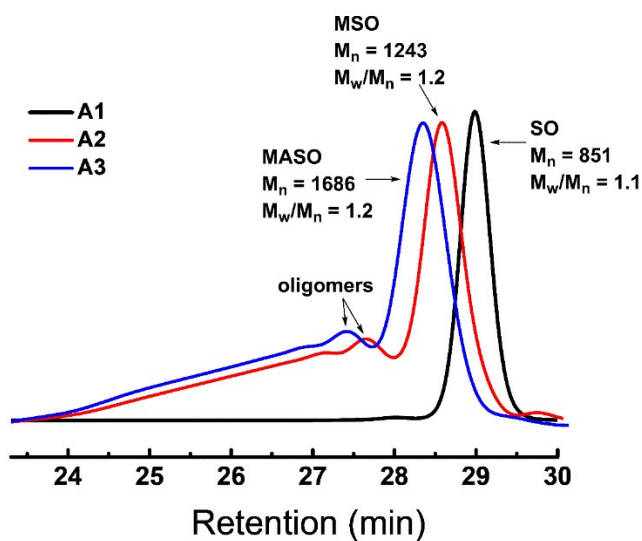

**Figure S3** GPC analysis of soybean oil (A1), modified soybean oil (A2) and acetoacetylated soybean oil (A3)

**Table S1** Properties of the acetoacetylated soybean oil

| Sample          | Reaction group ratio | GPC   |       |           | Yield (%) | Viscosity (Pa.s) |
|-----------------|----------------------|-------|-------|-----------|-----------|------------------|
|                 |                      | $M_n$ | $M_w$ | $\bar{D}$ |           |                  |
| A1 <sup>a</sup> | -                    | 851   | 953   | 1.1       | -         | 0.05             |
| A2              | 1:1.2                | 1243  | 1528  | 1.2       | 98        | 6.5              |
| A3              | 1:1                  | 1686  | 2045  | 1.2       | 93        | 2.3              |

3. The DSC curves indicating glass transition of the three films (P1, P2, P3)

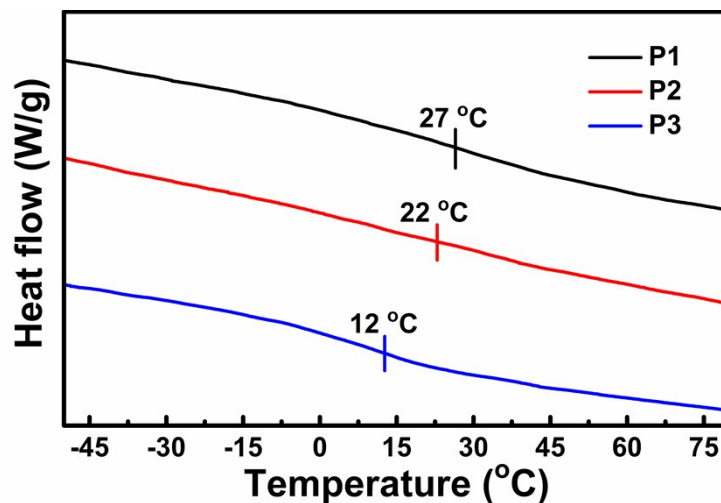

Figure S4 DSC curves indicate the glass transition temperature ( $T_g$ ) of the three films

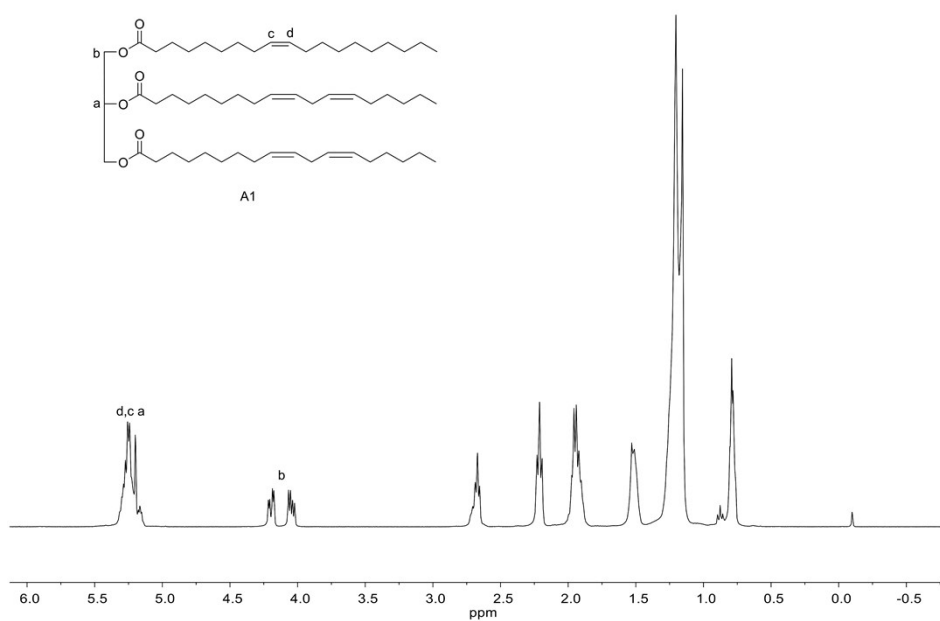

Figure S5  $^1\text{H}$  NMR (400 MHz) spectrum of soybean oil (SO)

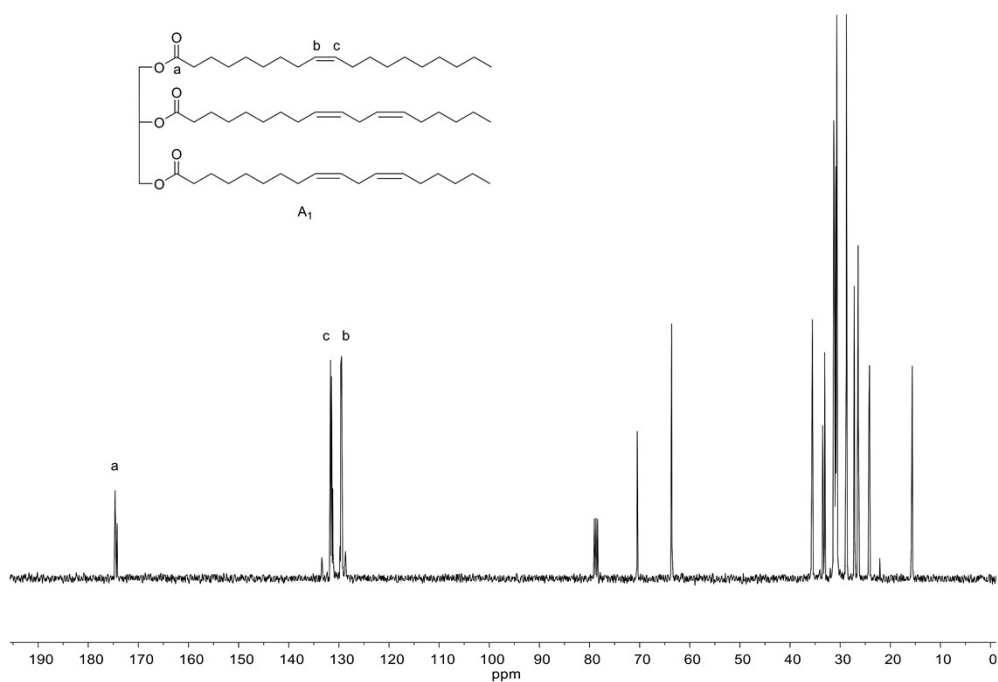

**Figure S6**  $^{13}\text{C}$  NMR (400 MHz) spectrum of soybean oil (SO)

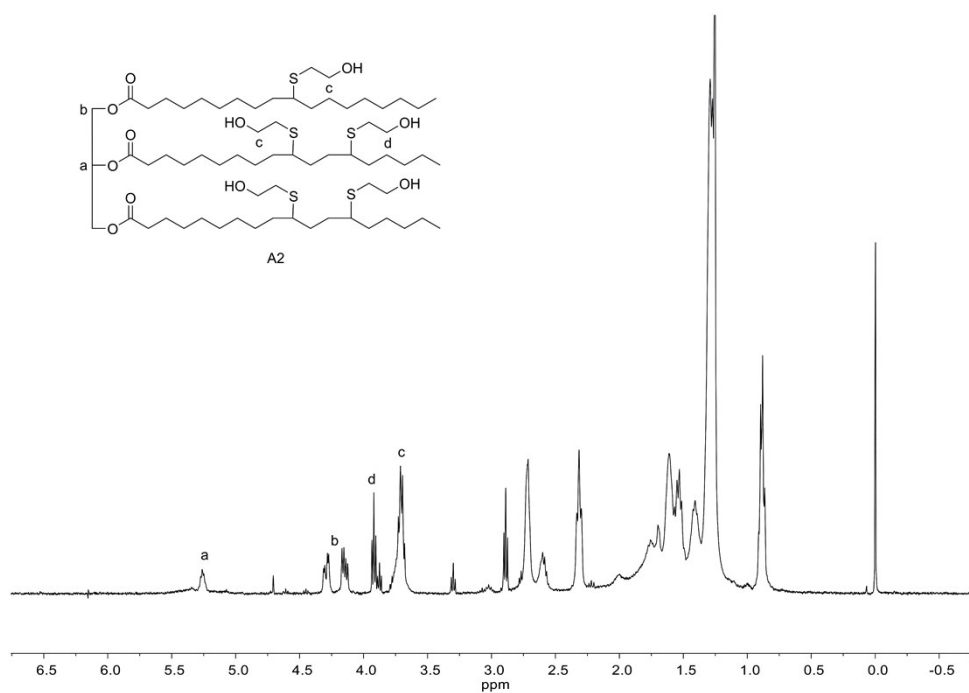

**Figure S7**  $^1\text{H}$  NMR (400 MHz) spectrum of modified soybean oil (MSO)

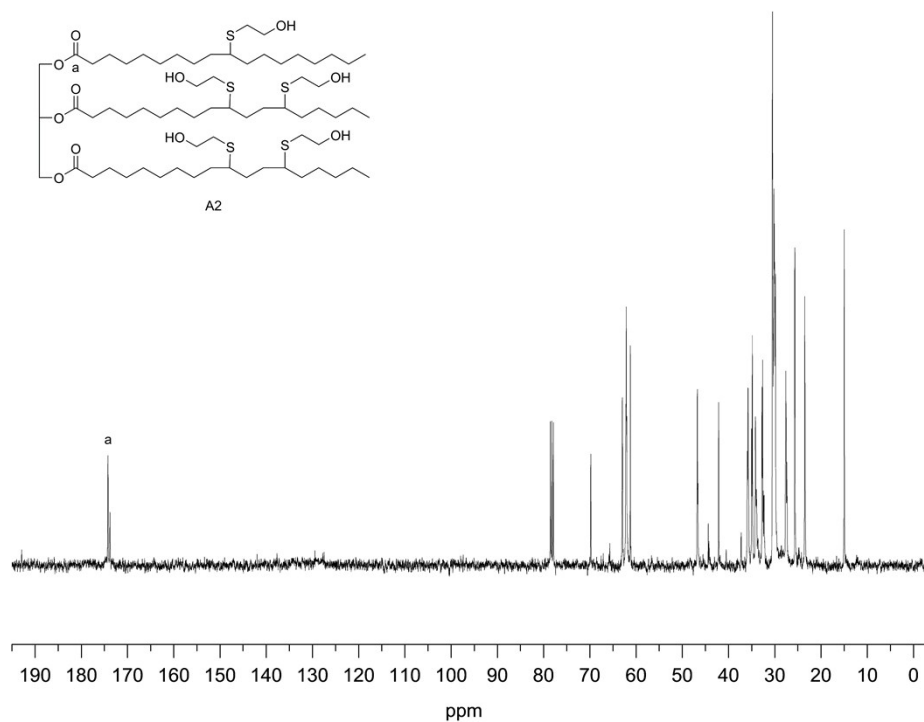

**Figure S8** <sup>13</sup>C NMR (400 MHz) spectrum of modified soybean oil (MSO)

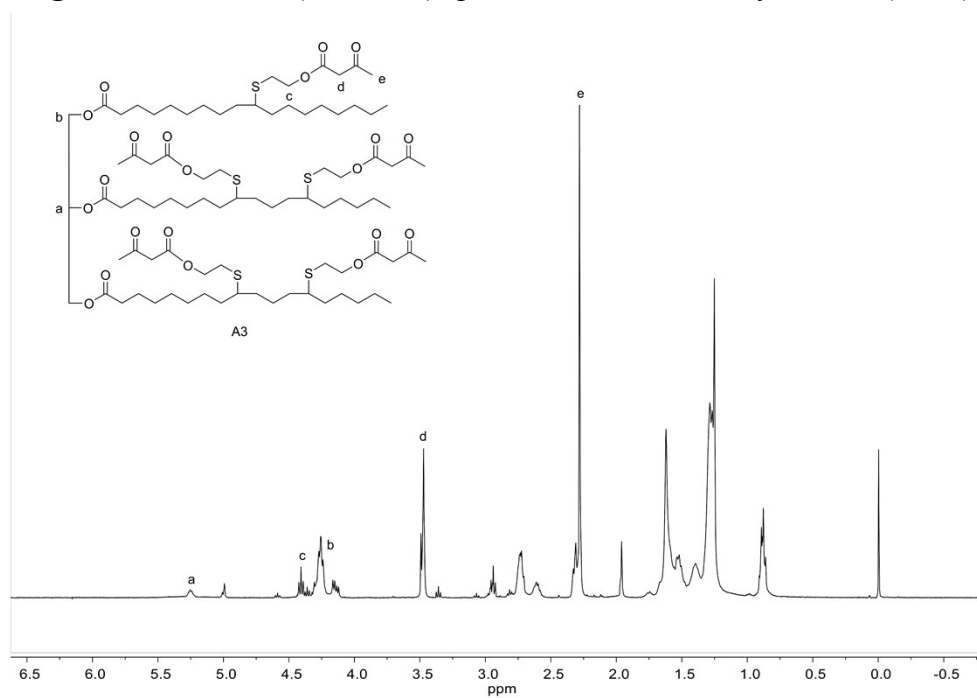

**Figure S9** <sup>1</sup>H NMR (400 MHz) spectrum of acetoacetylated soybean oil (MA-SO)

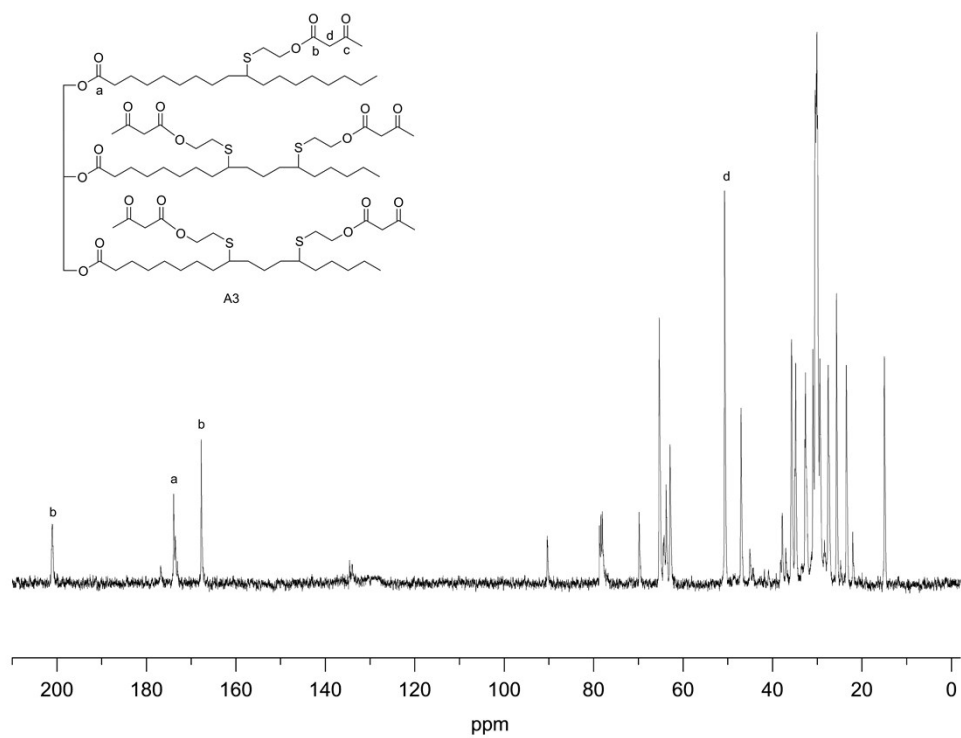

**Figure S10** <sup>13</sup>C NMR (400 MHz) spectrum of acetoacetylated soybean oil (MA-SO)
